# Supplementary material
Source: HighWire-hosted journal article supplement (https://bmjopen.bmj.com/content/12/4/e057530)
Supplement: inline-supplementary-material-2 [file inline-supplementary-material-2.pdf]

**Search strategy for CIHANL, PsycINFO, WebofScience, ASSIA, Medline, Embase**

((participat\* OR empower\* OR community OR "community?led" OR co-designed OR inclusion OR inclusive OR "capacity building" OR capabilities OR engagement OR consultation OR co-produc\* OR peer-led OR peer?to?peer OR task?shifting OR task?switching) **AND** ("Psychological disorder" OR "Psychological problem" OR "Psychological illness" OR "Psychological distress" OR "Psychiatric disorder" OR "Psychiatric problem" OR "Psychiatric illness" OR "Psychiatric distress" OR "Psychosocial disability" OR "Mental illness" OR "Mental health" OR SMI) **AND** ("Developing countr\*" OR "low?income countr\*" OR "middle?income countr\*" OR LMIC OR "third world"))

**Limits:** Peer reviewed

**Limits:** Date 2007-2021

**Search strategy for JSTOR**

[JSTOR which has a 200-character word limit. Discussion was had among the team via email and during monthly team meetings, as to how to truncate the search most effectively]

((participat\* OR community OR inclus\*) **AND** ab:(psychological OR "psychiatric disorder\*" OR "Psychosocial disability\*" OR "Mental illness\*" OR "Mental health") **AND** ("developing countries" OR LMIC))

**Limits:** Date 2007-2021
